# Supplementary material for: Efficient X-ray scintillating lead(ii)-based MOFs derived from rigid luminescent naphthalene motifs
Source: Royal Society of Chemistry journal article supplement (doi:10.1039/c8dt04587a), 2018-12-26
Supplement: c8dt04587a1.pdf [file c8dt04587a1.pdf]

## Electronic Supplementary Information

### Efficient X-ray scintillating lead(II)-based MOFs derived from rigid luminescent naphthalene motif

Jian Lu,<sup>a, b</sup> Hue-Huan Xin,<sup>a, b</sup> Yang-Jie Lin,<sup>a</sup> Shuai-Hua Wang,<sup>a</sup> Jian-Gang Xu,<sup>a</sup> Fa-Kun Zheng,<sup>a\*</sup> and Guo-Cong Guo<sup>a\*</sup>

Jian Lu: [lujian@fjirsm.ac.cn](mailto:lujian@fjirsm.ac.cn)

Xue-Huan Xin: [xhxin@fjirsm.ac.cn](mailto:xhxin@fjirsm.ac.cn)

Yang-Jie Lin: [yjlin@fjirsm.ac.cn](mailto:yjlin@fjirsm.ac.cn)

Shuai-Hua Wang: [shwang@fjirsm.ac.cn](mailto:shwang@fjirsm.ac.cn)

Jian-Gang Xu: [jgxu@fjirsm.ac.cn](mailto:jgxu@fjirsm.ac.cn)

Fa-Kun Zheng: [zfk@fjirsm.ac.cn](mailto:zfk@fjirsm.ac.cn)

Guo-Cong Guo: [gcguo@fjirsm.ac.cn](mailto:gcguo@fjirsm.ac.cn)

<sup>a</sup>*State Key Laboratory of Structural Chemistry, Fujian Institute of Research on the Structure of Matter, Chinese Academy of Sciences, Fuzhou, Fujian 350002, P. R. China*

<sup>b</sup>*University of Chinese Academy of Sciences, Beijing 100039, P.R. China*

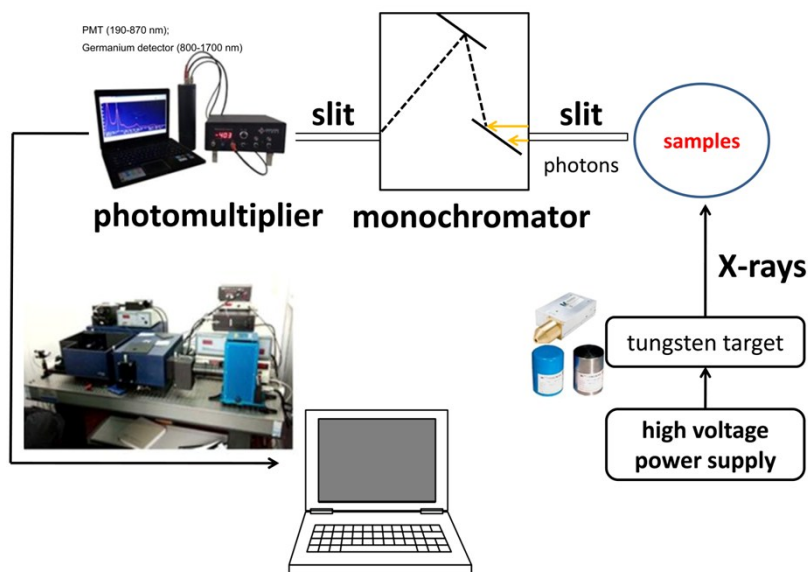

**Fig. S1** The self-built scintillating measurement equipment. The whole backbone of the X-ray stimulated Fluorescence Spectrometer was from FLS920 Spectrometer, except that the excitation Xe lamp is replaced by a highly purified tungsten target (Moxtek® MAGPRO X-ray sources: <http://moxtek.com/xray-product/60kv-70kv-12w-magpro-x-ray-source/>).

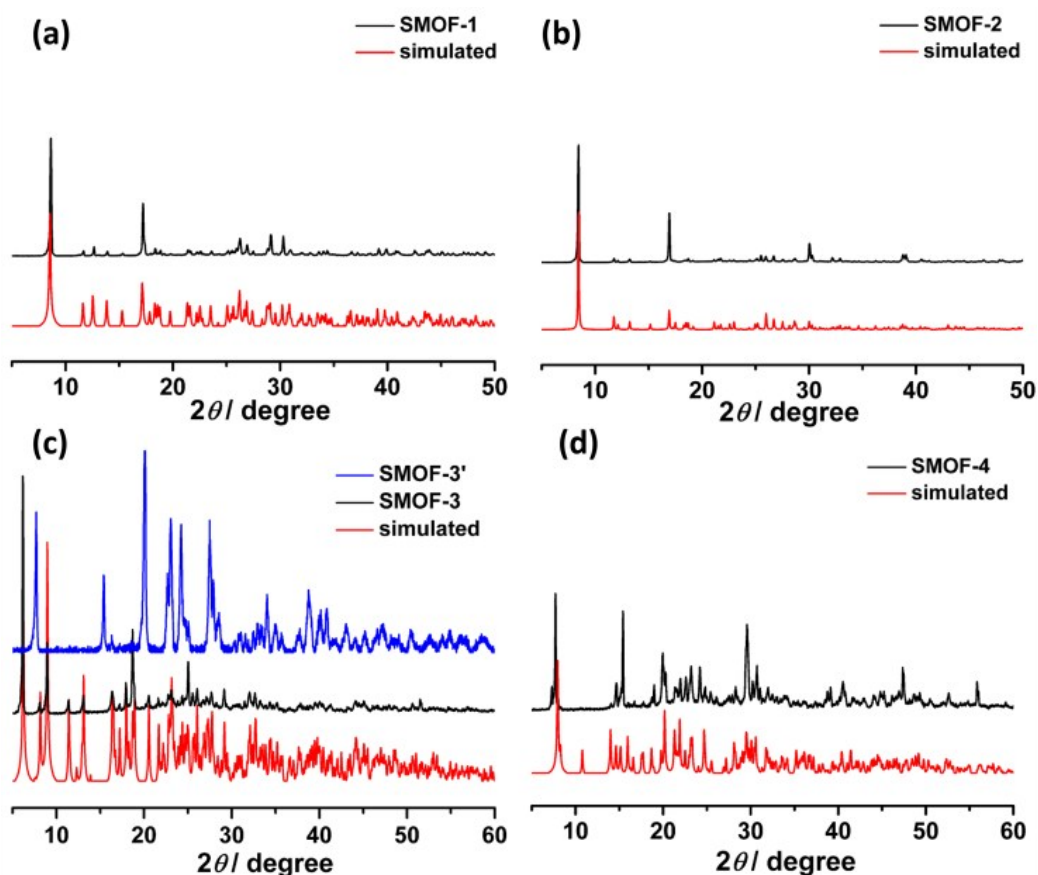

**Fig. S2** The experimental and simulated powder X-ray diffraction patterns of SMOF-1 (a), SMOF-2 (b), SMOF-3 & SMOF-3' (c) and SMOF-4 (d).

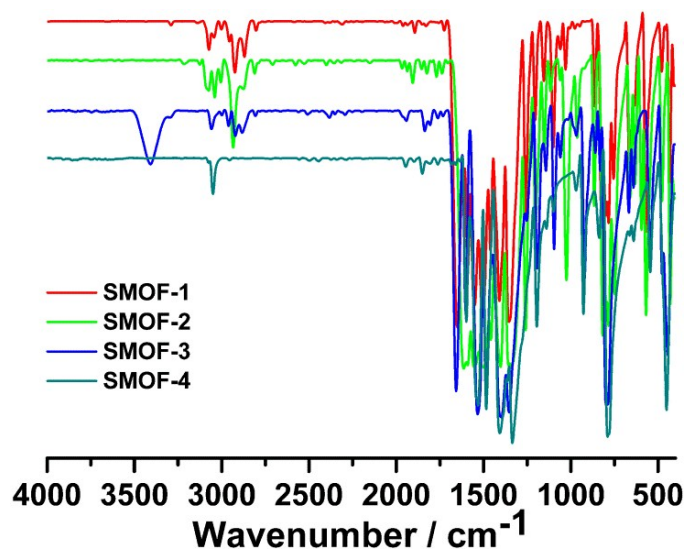

Fig. S3 The FT-IR spectra of SMOFs 1-4.

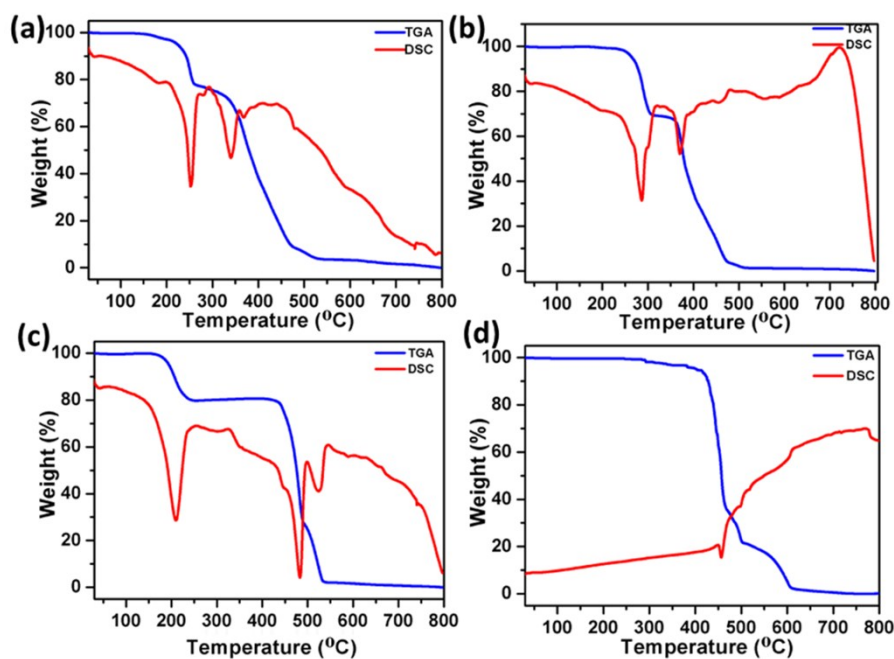

Fig. S4 The TGA and DSC curves of SMOF-1 (a), SMOF-2 (b), SMOF-3 (c) and SMOF-4 (d).

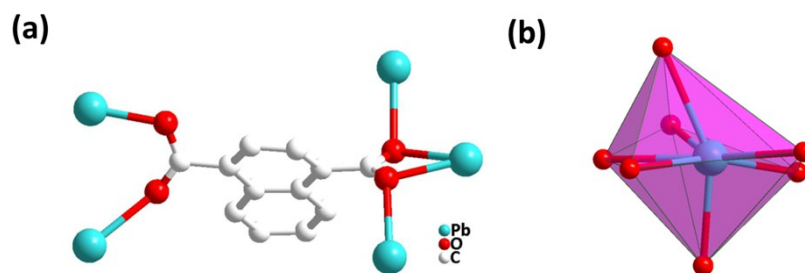

Fig. S5 For SMOF-1: (a) the coordination mode of 1,4-ndc<sup>2-</sup>, (b) the holo-directed coordination structure of Pb(II) (seven coordinated).

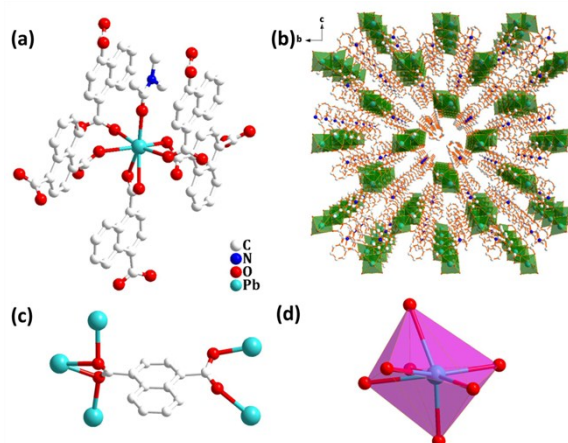

**Fig. S6** For **SMOF-2**: (a) the coordination environment of Pb(II), (b) the 3D framework, (c) the  $\mu_5$ -coordinated mode of 1,4-ndc<sup>2-</sup>, (d) the holo-directed coordination structure of Pb(II) (seven coordinated).

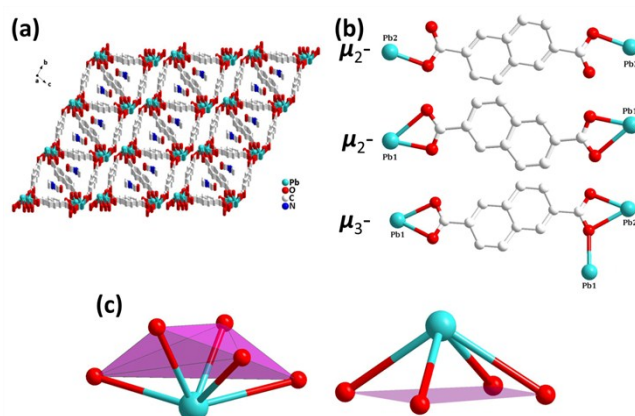

**Fig. S7** For **SMOF-3**: (a) the 3D supramolecular network (“AAA” type), (b) the coordination mode of 2,6-ndc<sup>2-</sup>, (c) geometrical configuration of Pb, hemi-directed coordination structure of Pb1(left) and Pb2 (right).

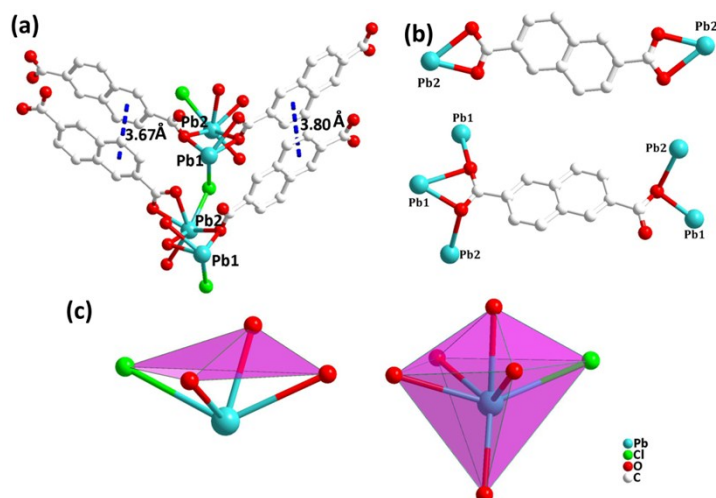

**Fig. S8** For **SMOF-4**: (a) the aggregation model of  $\pi$ - $\pi$  stacking, (b) the coordination mode of 2,6-ndc<sup>2-</sup>, (c) geometrical configuration of Pb, hemi-directed coordination structure of Pb1 (left) and holo-directed coordination structure of Pb2 (right).

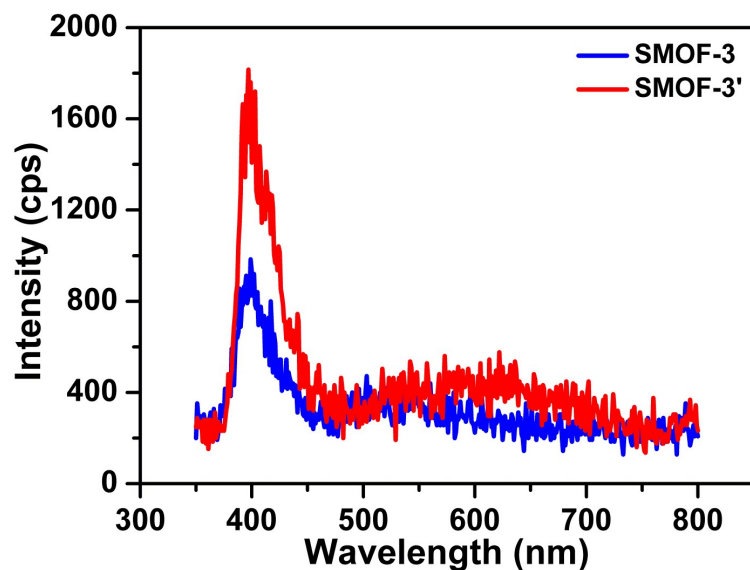

**Fig. S9** The XSL spectra of SMOF-3 (blue) and desolvated SMOF-3' (red) under the tube voltage 30 kV and tube current 100  $\mu$ A.

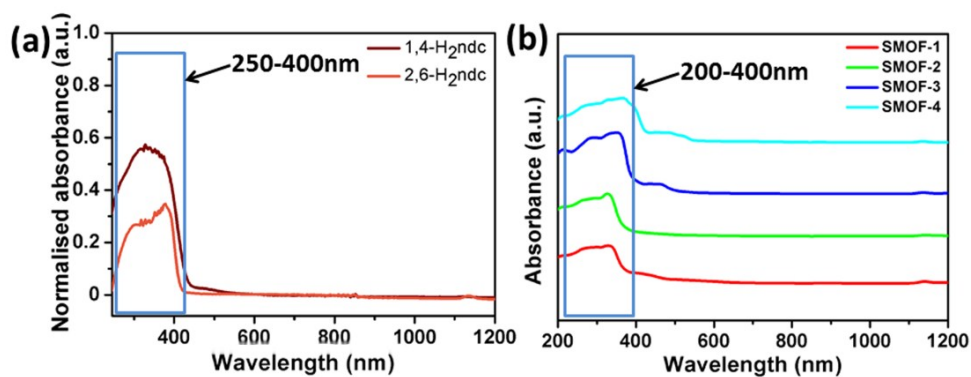

**Fig. S10** The UV-Vis absorption spectra of free ligands 1,4-H<sub>2</sub>ndc and 2,6-H<sub>2</sub>ndc (a) and SMOFs 1-4 (b).

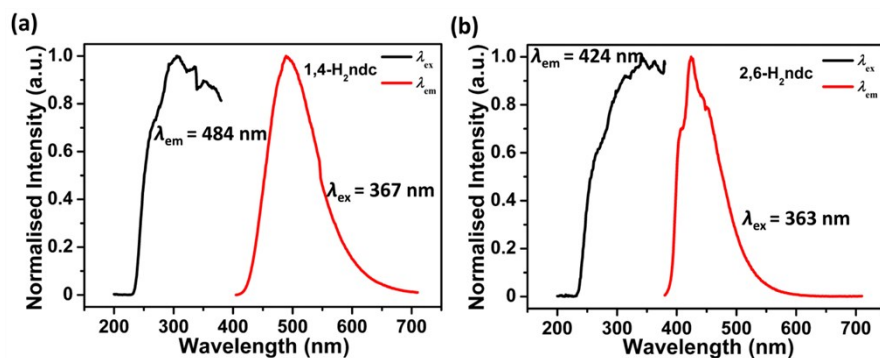

**Fig. S11** The excitation and emission spectra of free ligands 1,4-H<sub>2</sub>ndc and 2,6-H<sub>2</sub>ndc.

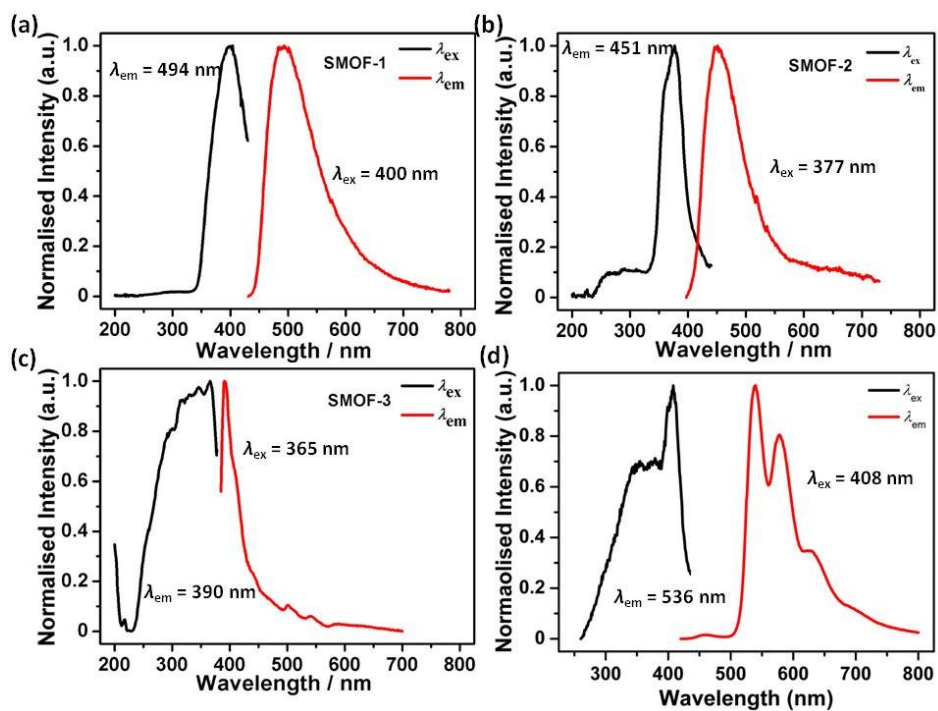

**Fig. S12** Solid-state steady excitation and emission spectra of SMOFs 1-4.

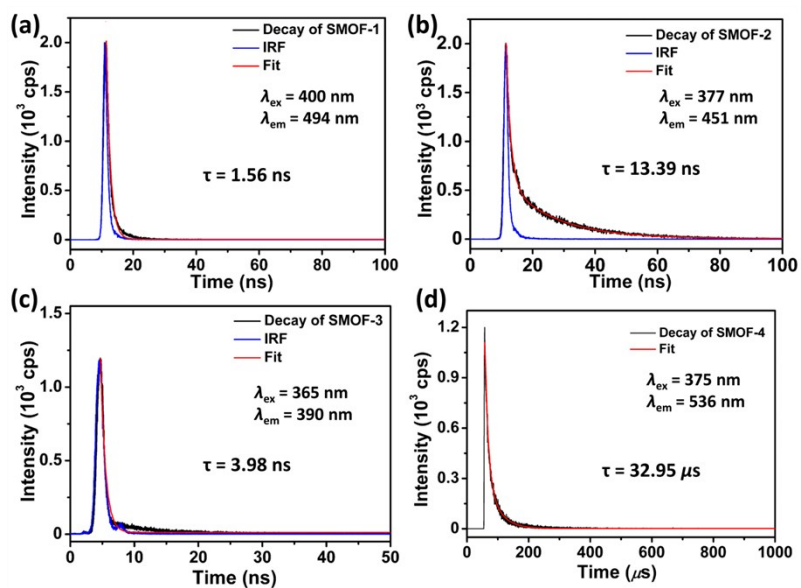

**Fig S13.** Luminescence lifetimes of SMOF-1 (a), SMOF-2 (b), SMOF-3 (c) and SMOF-4 (d) in the solid state measured at room temperature.

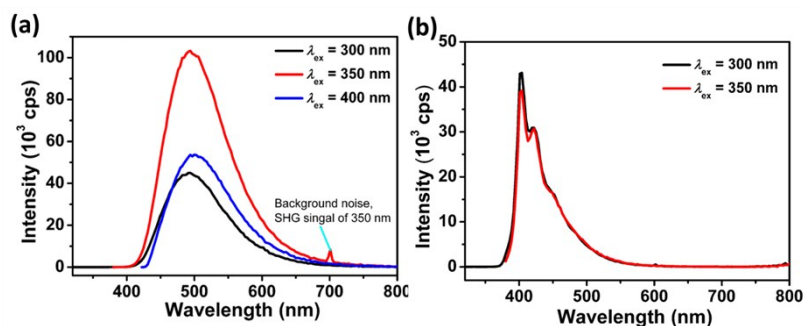

**Fig. S14** Luminescent spectra of free ligands 1,4-H<sub>2</sub>ndc (a) and 2,6-H<sub>2</sub>ndc (b) towards varied excitation wavelengths, respectively.

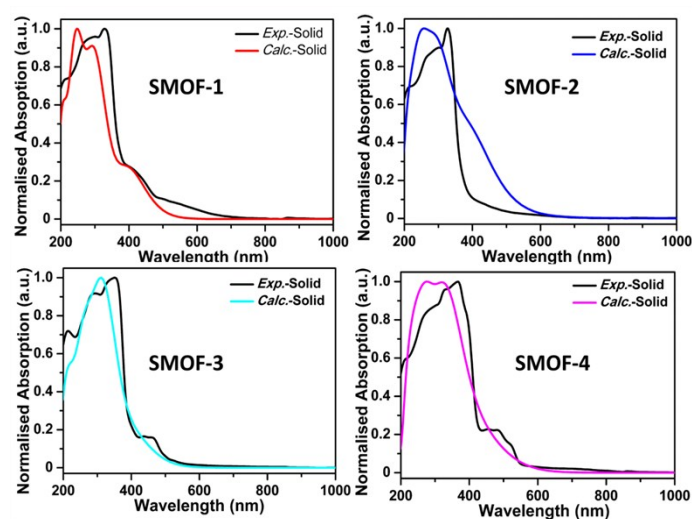

**Fig. S15** Experimental UV-Vis normalized absorption spectra and calculated dielectric constants (imaginary part) of SMOFs 1-4 transferred as in nm unit.

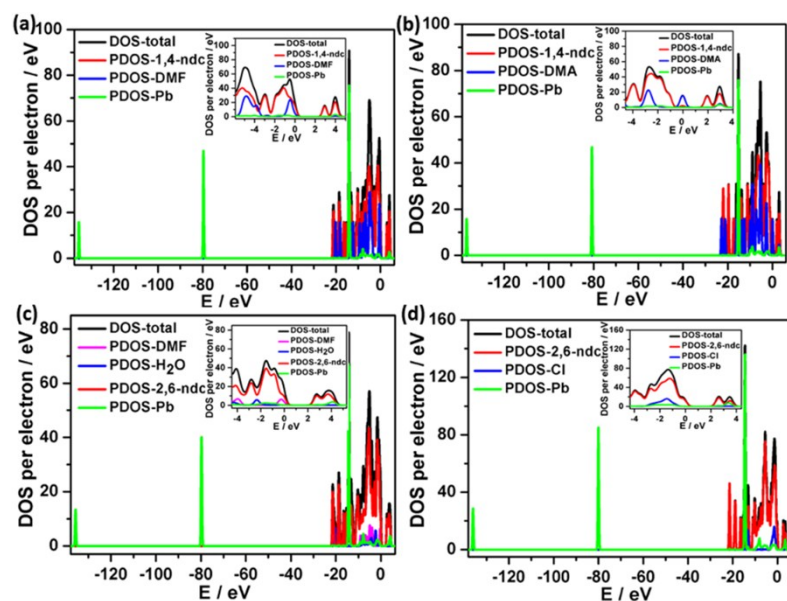

**Fig. S16** Profiles of the total/partial electronic density of state of SMOF-1 (a), SMOF-2 (b), SMOF-3 (c) and SMOF-4 (d).

The bond lengths and angles information are listed in Tables S1-S4. Hydrogen bond information is listed in Table S5 with Olex2 1.2 program.<sup>2-3</sup>

**Table S1** Selected bond lengths and bond angles for **SMOF 1**.

|                     |            |
|---------------------|------------|
| Pb(1)–O(3)#1        | 2.643(5)   |
| Pb(1)–O(3)#2        | 2.683(5)   |
| Pb(1)–O(4)#2        | 2.525(5)   |
| Pb(1)–O(4)#3        | 2.706(4)   |
| Pb(1)–O(1)          | 2.685(5)   |
| Pb(1)–O(2)#4        | 2.344(6)   |
| Pb(1)–O(5)          | 2.672(7)   |
| O(3)#1–Pb(1)–O(3)#2 | 118.89(11) |
| O(3)#1–Pb(1)–O(4)#3 | 167.88(15) |
| O(3)#2–Pb(1)–O(4)#3 | 67.38(14)  |
| O(3)#2–Pb(1)–O(1)   | 81.14(16)  |
| O(3)#1–Pb(1)–O(1)   | 69.68(16)  |
| O(3)#1–Pb(1)–O(5)   | 91.5(2)    |
| O(4)#2–Pb(1)–O(3)#2 | 50.06(14)  |
| O(4)#2–Pb(1)–O(3)#1 | 70.64(15)  |
| O(4)#2–Pb(1)–O(4)#3 | 111.98(12) |
| O(4)#2–Pb(1)–O(1)   | 75.10(19)  |
| O(4)#2–Pb(1)–O(5)   | 161.82(19) |
| O(1)–Pb(1)–O(4)#3   | 122.38(16) |
| O(2)#4–Pb(1)–O(3)#2 | 103.4(2)   |
| O(2)#4–Pb(1)–O(3)#1 | 82.8(2)    |
| O(2)#4–Pb(1)–O(4)#2 | 85.4(2)    |
| O(2)#4–Pb(1)–O(4)#3 | 85.6(2)    |
| O(2)#4–Pb(1)–O(1)   | 150.2(2)   |
| O(2)#4–Pb(1)–O(5)   | 96.2(3)    |
| O(5)–Pb(1)–O(3)#2   | 145.3(2)   |
| O(5)–Pb(1)–O(4)#3   | 86.2(2)    |
| O(5)–Pb(1)–O(1)     | 95.8(2)    |

Symmetric codes: #1  $1 - x, -1/2 + y, 1/2 - z$ ; #2  $1/2 - x, 1 - y, 1/2 + z$ ; #3  $3/2 - x, 1 - y, 1/2 + z$ ; #4  $1/2 + x, 1/2 - y, 1 - z$ .

**Table S2** Selected bond lengths and bond angles for **SMOF-2**.

|              |          |
|--------------|----------|
| Pb(1)–O(1)#1 | 2.669(5) |
| Pb(1)–O(1)   | 2.552(5) |
| Pb(1)–O(2)#2 | 2.699(6) |
| Pb(1)–O(3)#3 | 2.372(6) |
| Pb(1)–O(4)#4 | 2.690(6) |
| Pb(1)–O(5)   | 2.525(7) |



---

|                     |            |
|---------------------|------------|
| O(1)–Pb(1)–O(1)#1   | 115.24(14) |
| O(1)–Pb(1)–O(2)#2   | 73.31(17)  |
| O(1)#1–Pb(1)–O(2)#2 | 168.21(17) |
| O(1)#1–Pb(1)–O(4)#3 | 119.41(19) |
| O(1)–Pb(1)–O(4)#3   | 76.9(2)    |
| O(3)#4–Pb(1)–O(1)   | 86.4(2)    |
| O(3)#4–Pb(1)–O(1)#1 | 85.4(2)    |
| O(3)#4–Pb(1)–O(2)#2 | 87.2(2)    |
| O(3)#4–Pb(1)–O(4)#3 | 154.3(2)   |
| O(3)#4–Pb(1)–O(5)   | 92.1(3)    |
| O(4)#3–Pb(1)–O(2)#2 | 69.41(18)  |
| O(5)–Pb(1)–O(1)#1   | 86.6(3)    |
| O(5)–Pb(1)–O(1)     | 157.9(3)   |
| O(5)–Pb(1)–O(2)#2   | 84.6(3)    |
| O(5)–Pb(1)–O(4)#3   | 96.0(3)    |

---

Symmetric codes: #1  $1/2 + x, 1/2 - y, 2 - z$ ; #2  $1/2 + x, 1/2 - y, 1 - z$ ; #3  $3/2 - x, -y, -1/2 + z$ ;  
#4  $1 - x, 1/2 + y, 3/2 - z$ .

**Table S3** Selected bond lengths and bond angles for **SMOF-3**

---

|                     |            |
|---------------------|------------|
| Pb(1)–O(2)          | 2.664(4)   |
| Pb(1)–O(1)          | 2.335(4)   |
| Pb(1)–O(8)#1        | 2.500(4)   |
| Pb(1)–O(9)#1        | 2.553(4)   |
| Pb(1)–O(3)          | 2.580(4)   |
| Pb(2)–O(5)          | 2.318(4)   |
| Pb(2)–O(3)          | 2.646(4)   |
| Pb(2)–O(1W)         | 2.376(5)   |
| Pb(2)–O(4)          | 2.429(4)   |
|                     |            |
| O(1)–Pb(1)–O(2)     | 51.61(13)  |
| O(1)–Pb(1)–O(8)#1   | 74.52(14)  |
| O(1)–Pb(1)–O(9)#1   | 79.75(15)  |
| O(1)–Pb(1)–O(3)     | 84.65(15)  |
| O(8)#1–Pb(1)–O(2)   | 108.31(12) |
| O(8)#1–Pb(1)–O(9)#1 | 51.40(13)  |
| O(8)#1–Pb(1)–O(3)   | 70.88(12)  |
| O(9)#1–Pb(1)–O(2)   | 73.39(13)  |
| O(9)#1–Pb(1)–O(3)   | 122.38(13) |
| O(3)–Pb(1)–O(2)     | 132.09(14) |
| O(5)–Pb(2)–O(3)     | 112.43(15) |
| O(5)–Pb(2)–O(1W)    | 75.98(16)  |

---

|                  |           |
|------------------|-----------|
| O(5)–Pb(2)–O(4)  | 81.79(16) |
| O(1W)–Pb(2)–O(3) | 77.95(17) |
| O(1W)–Pb(2)–O(4) | 108.6(2)  |
| O(4)–Pb(2)–O(3)  | 50.68(13) |

Symmetric code: #1  $x, 1 + y, z$ .

**Table S4** Selected bond lengths and bond angles for **SMOF-4**.

|                      |            |
|----------------------|------------|
| Pb(1)–Cl(1)#1        | 2.8919(17) |
| Pb(1)–O(5)#1         | 2.414(4)   |
| Pb(1)–O(6)#1         | 2.710(4)   |
| Pb(1)–O(1)           | 2.355(4)   |
| Pb(2)–Cl(1)#2        | 2.9173(17) |
| Pb(2)–O(3)           | 2.605(4)   |
| Pb(2)–O(5)#1         | 2.731(5)   |
| Pb(2)–O(6)#3         | 2.687(4)   |
| Pb(2)–O(1)           | 2.677(4)   |
| Pb(2)–O(4)           | 2.392(4)   |
| O(5)#1–Pb(1)–Cl(1)#1 | 76.02(11)  |
| O(5)#1–Pb(1)–O(6)#1  | 50.60(14)  |
| O(6)#1–Pb(1)–Cl(1)   | 126.45(10) |
| O(1)–Pb(1)–Cl(1)     | 76.55(12)  |
| O(1)–Pb(1)–O(5)#1    | 79.23(15)  |
| O(1)–Pb(1)–O(6)#1    | 95.08(15)  |
| O(3)–Pb(2)–Cl(1)#2   | 71.29(10)  |
| O(3)–Pb(2)–O(5)#1    | 71.81(13)  |
| O(3)–Pb(2)–O(6)#3    | 134.73(13) |
| O(3)–Pb(2)–O(1)      | 79.26(14)  |
| O(5)#1–Pb(2)–Cl(1)#2 | 142.11(10) |
| O(6)#3–Pb(2)–Cl(1)#2 | 120.16(11) |
| O(6)#3–Pb(2)–O(5)#1  | 92.24(14)  |
| O(1)–Pb(2)–O(5)#1    | 68.43(13)  |
| O(1)–Pb(2)–O(6)#3    | 134.73(14) |
| O(1)–Pb(2)–Cl(1)# 1  | 96.39(10)  |
| O(4)–Pb(2)–Cl(1)# 2  | 81.96(12)  |
| O(4)–Pb(2)–O(3)      | 52.58(14)  |
| O(4)–Pb(2)–O(5)#1    | 82.55(14)  |
| O(4)–Pb(2)–O(6)#3    | 84.13(14)  |
| O(4)–Pb(2)–O(1)      | 129.88(15) |

Symmetric codes: #1  $1 - x, 1/2 + y, 1/2 - z$ ; #2  $2 + x, 3/2 - y, -1/2 + z$ ; #3  $2 - x, 1/2 + y, 1/2 - z$ .

**Table S5** Hydrogen bonding distance/Å and angle/° in the crystal structure of **SMOF-3**.

| D–H...A          | d(D–H) | d(H..A) | d(D..A) | ∠DHA   |
|------------------|--------|---------|---------|--------|
| O1W–H1WA...O10#4 | 0.941  | 1.855   | 2.640   | 139.25 |
| O1W–H1WB...O(1)  | 0.947  | 1.883   | 2.790   | 159.59 |

**Table S6** The geometrical parameters of  $\pi$ – $\pi$  interactions between aromatic rings in **SMOF-4** calculated by the PLATON software.<sup>4</sup>

| Cg(I)-Cg(J) | Cg-Cg(Å) | Alpha(°) | Beta(°) | Gamma(°) | CgI_Perp(Å) | CgJ_Perp(Å) | Slippage(Å) |
|-------------|----------|----------|---------|----------|-------------|-------------|-------------|
| Cg1-Cg3     | 3.718(4) | 1.3(3)   | 22.8    | 22.4     | 3.437(3)    | 3.429(3)    | 1.439       |
| Cg1-Cg3     | 3.664(4) | 1.3(3)   | 19.2    | 20.3     | -3.437(3)   | 3.461(3)    | 1.202       |
| Cg1-Cg4     | 3.664(4) | 1.3(3)   | 19.2    | 20.3     | 3.437(3)    | 3.461(3)    | 1.202       |
| Cg1-Cg4     | 3.718(4) | 1.3(3)   | 22.8    | 22.4     | -3.437(3)   | 3.429(3)    | 1.439       |
| Cg2-Cg2     | 3.800(4) | 0.0(3)   | 26.8    | 26.8     | -3.391(3)   | -3.391(3)   | 1.715       |
| Cg2-Cg3     | 3.756(4) | 5.1(3)   | 25.5    | 27.8     | 3.322(3)    | 3.390(3)    | 1.618       |
| Cg2-Cg4     | 3.756(4) | 5.1(3)   | 25.5    | 27.8     | -3.322(3)   | 3.390(3)    | 1.618       |
| Cg3-Cg1     | 3.718(4) | 1.3(3)   | 22.4    | 22.8     | 3.428(3)    | 3.436(3)    | 1.419       |
| Cg3-Cg1     | 3.664(4) | 1.3(3)   | 20.3    | 19.2     | 3.461(3)    | -3.436(3)   | 1.270       |
| Cg3-Cg2     | 3.755(4) | 5.1(3)   | 27.8    | 25.5     | 3.389(3)    | 3.322(3)    | 1.751       |
| Cg4-Cg1     | 3.664(4) | 1.3(3)   | 20.3    | 19.2     | 3.461(3)    | 3.436(3)    | 1.270       |
| Cg4-Cg1     | 3.718(4) | 1.3(3)   | 22.4    | 22.8     | 3.428(3)    | -3.436(3)   | 1.419       |
| Cg4-Cg2     | 3.755(4) | 5.1(3)   | 27.8    | 25.5     | 3.390(3)    | -3.322(3)   | 1.751       |

Notes: Cg(I) / Cg(J) = the plane of the ring in the structure, Alpha = dihedral angle between planes of ring I and J (°), Beta = Angle Cg(I)- Cg(J) or Cg(I)-->Me vector and normal to plane I (°), Gamma = Angle Cg(I)-Cg(J) vector and normal to plane J (°), Cg-Cg = distance between ring centroids (Å), CgI\_Perp = perpendicular distance of Cg(I) on ring J (Å), CgJ\_Perp = Perpendicular distance of Cg(J) on ring I (°), Slippage = Distance between Cg(I) and Perpendicular Projection of Cg(J) on Ring I (°).

**Table S7** Fluorescence decay parameters of **SMOFs 1-4**.

| $\lambda_{em}$ / nm | $\tau_1$     | A <sub>1</sub> (%) | $\tau_2$      | A <sub>2</sub> (%) | $\tau_3$      | A <sub>3</sub> (%) | $\tau$        |
|---------------------|--------------|--------------------|---------------|--------------------|---------------|--------------------|---------------|
| <b>SMOF-1</b>       |              |                    |               |                    |               |                    |               |
| 494                 | 1.01 ns      | 77.68              | 3.68 ns       | 22.32              |               |                    | 1.56 ns       |
| <b>SMOF-2</b>       |              |                    |               |                    |               |                    |               |
| 451                 | 1.53 ns      | 21.07              | 16.64 ns      | 78.93              |               |                    | 13.39 ns      |
| <b>SMOF-3</b>       |              |                    |               |                    |               |                    |               |
| 390                 | 0.52 ns      | 55.04              | 8.23 ns       | 44.96              |               |                    | 3.98 ns       |
| <b>SMOF-4</b>       |              |                    |               |                    |               |                    |               |
| 424                 | 0.78 ns      | 31.43              | 5.08 ns       | 20.80              | 28.98 ns      | 47.77              | 14.37 ns      |
| 536                 | 7.78 $\mu$ s | 19.77              | 24.61 $\mu$ s | 59.93              | 82.80 $\mu$ s | 20.30              | 32.95 $\mu$ s |
| 578                 | 7.94 $\mu$ s | 18.65              | 23.75 $\mu$ s | 58.84              | 80.36 $\mu$ s | 22.51              | 33.55 $\mu$ s |
| 633                 | 7.49 $\mu$ s | 17.25              | 23.17 $\mu$ s | 53.72              | 91.56 $\mu$ s | 29.04              | 47.15 $\mu$ s |

**Table S8** Schematic representation of the optimized geometrical structure and HOMO–1, HOMO, LUMO and LUMO+1 orbitals of SMOFs **1–4** drawn with Multiwfn software.<sup>5</sup>

| SMOF   | 1                                                                                  | 2                                                                                  | 3                                                                                   | 4                                                                                    |
|--------|------------------------------------------------------------------------------------|------------------------------------------------------------------------------------|-------------------------------------------------------------------------------------|--------------------------------------------------------------------------------------|
| HOMO–1 | 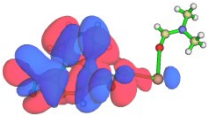  |   |   |   |
| HOMO   |   |   |   |   |
| LUMO   |   |   |   |   |
| LUMO+1 |  |  |  |  |

## References

- 1 J. P. Perdew, K. Burke and M. Ernzerhof, *Phys Rev Lett*, 1996, **77**, 3865–3868.
- 2 O. V. Dolomanov, L.J. Bourhis, R.J. Gildea, J. A. K. Howard and H. Puschmann, *J. Appl. Cryst.*, 2009, **42**, 339–341.
- 3 G. M. Sheldrick, *Acta Cryst. A*, 2015, **71**, 3–8.
- 4 A. L. Spek, *J. Appl. Cryst.*, 2003, **36**, 7–13.
- 5 T. Lu and F. Chen, *J. Comput. Chem.*, 2012, **33**, 580–592.
